# Supplementary material for: Antileukemic, Antioxidant, Anti-Inflammatory and Healing Activities Induced by a Polyphenol-Enriched Fraction Extracted from Leaves of Myrtus communis L
Source: MDPI journal article supplement (doi:10.3390/nu14235055), 2022-11-27

# = Shimadzu LabSolutions Quant. Browser Data Report =

Acquired by : System Administrator  
 Data Acquired : 26/05/2021 11:20:42  
 Sample Type : Unknown  
 Sample Name : lipophylic extract 15  
 Sample ID :  
 Sample Amount : 1  
 Dilution Factor : 1  
 Vial# : 82  
 Injection Volume : 0.5 uL  
 Data Filename : lipophylic extract 15\_005.lcd  
 Method Filename : polifenoli screening SIM.lcm  
 Processed by : System Administrator  
 Modified Date : 26/05/2021 12:36:49

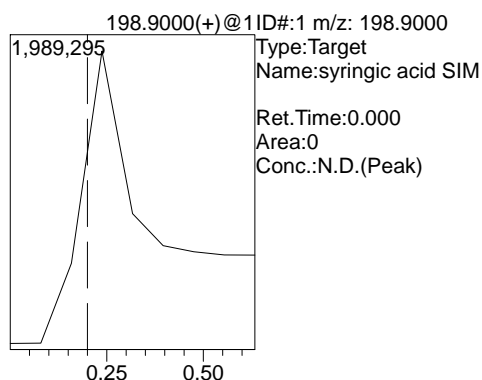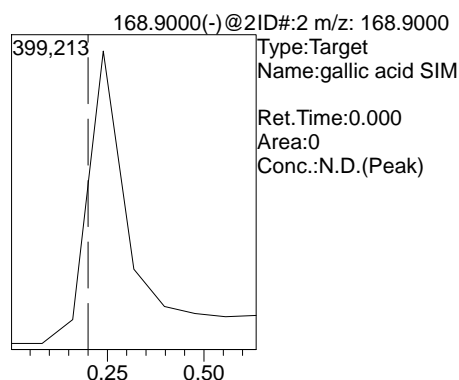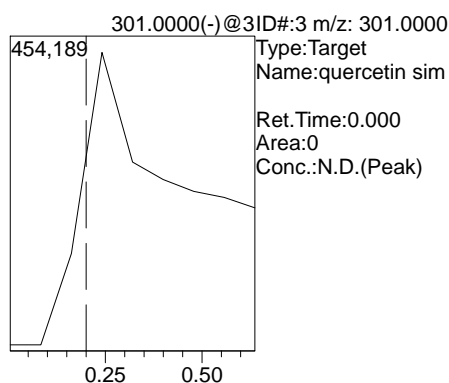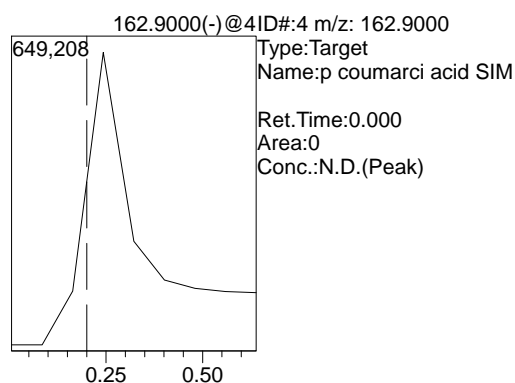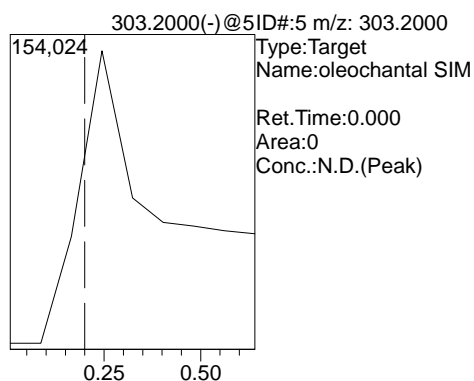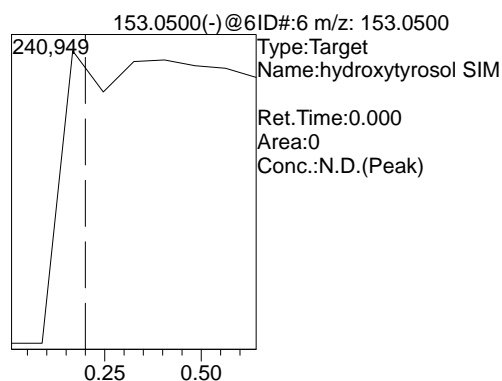

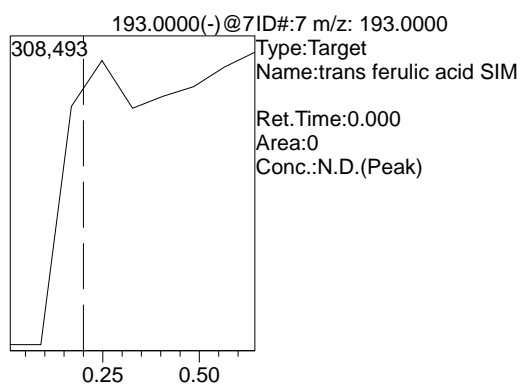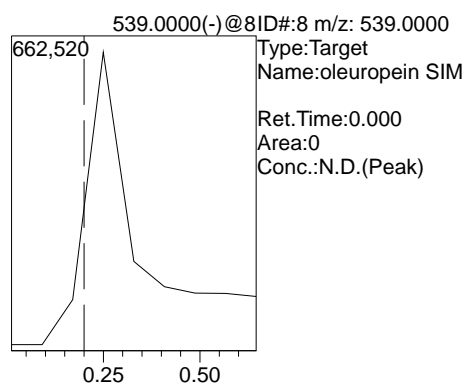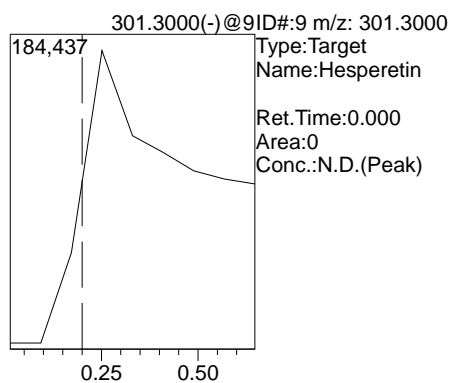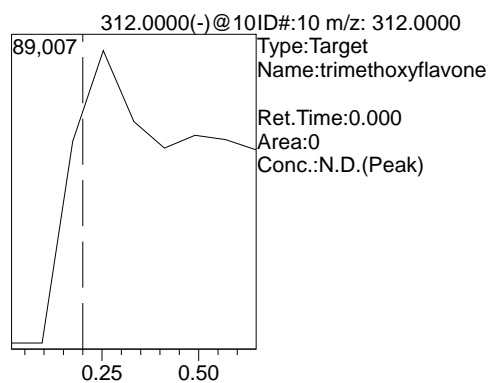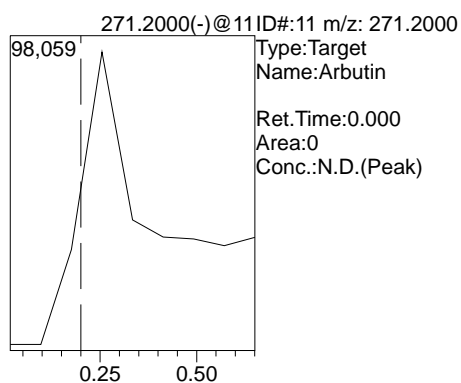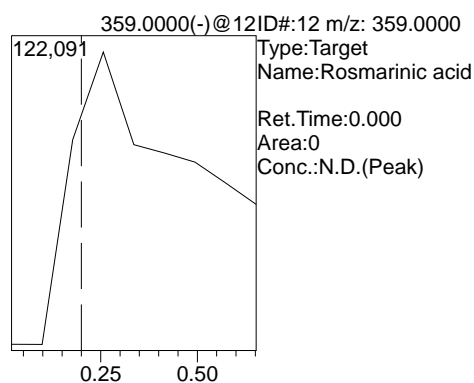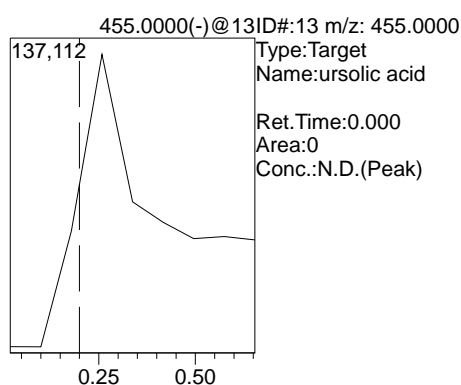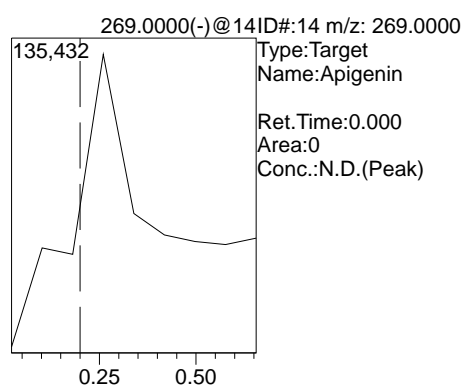

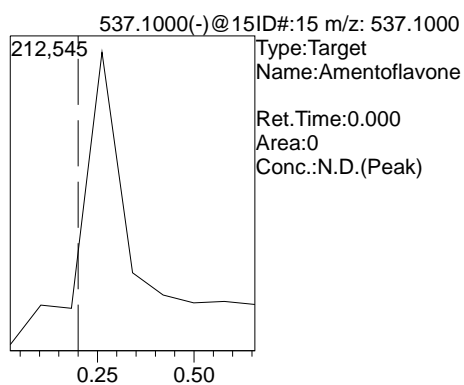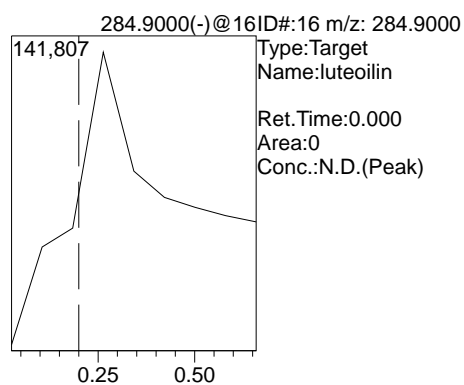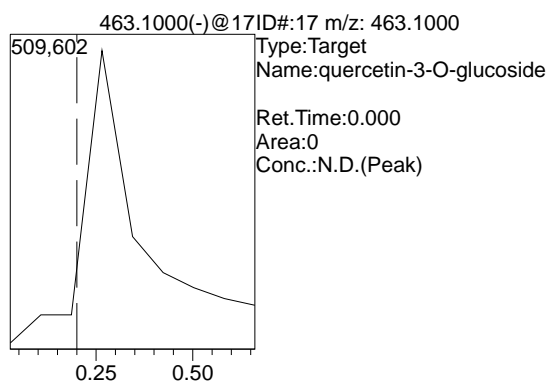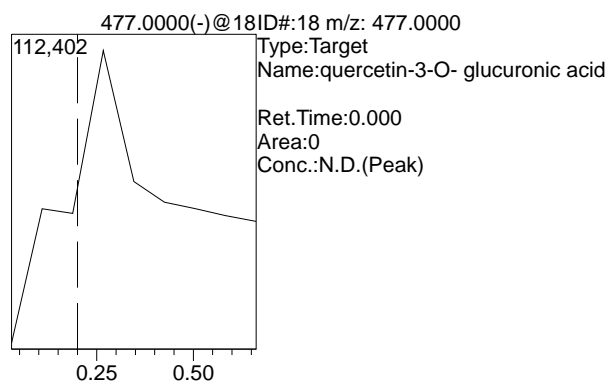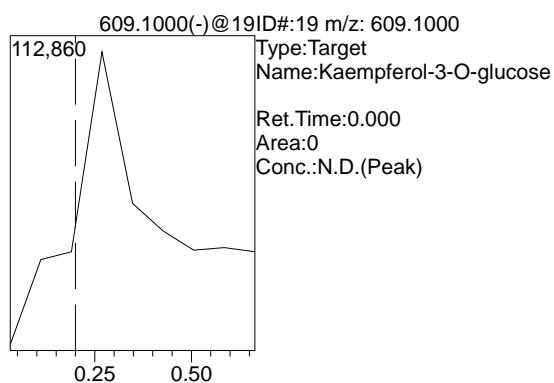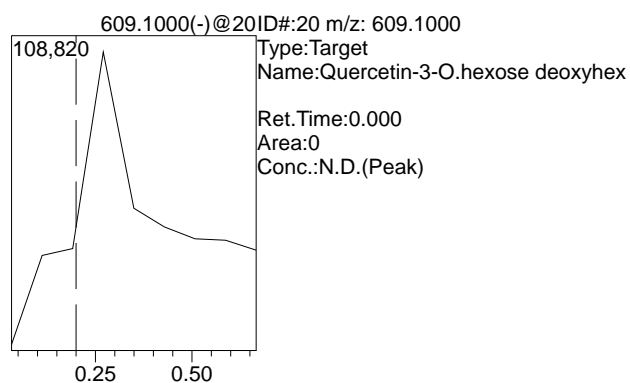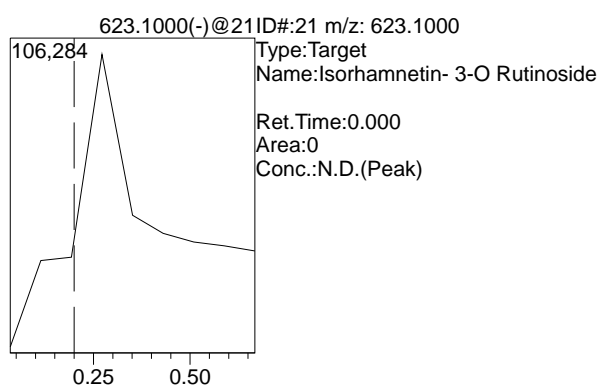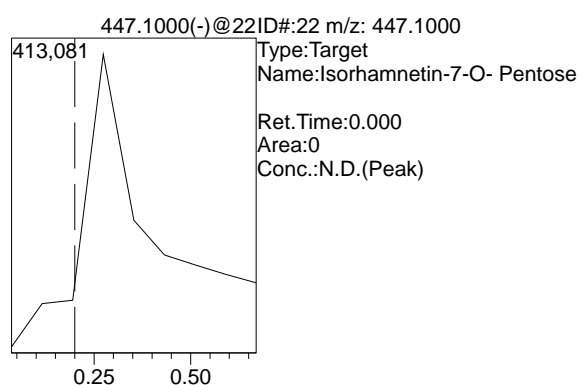

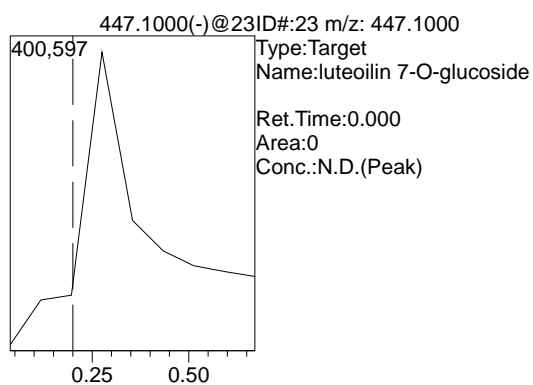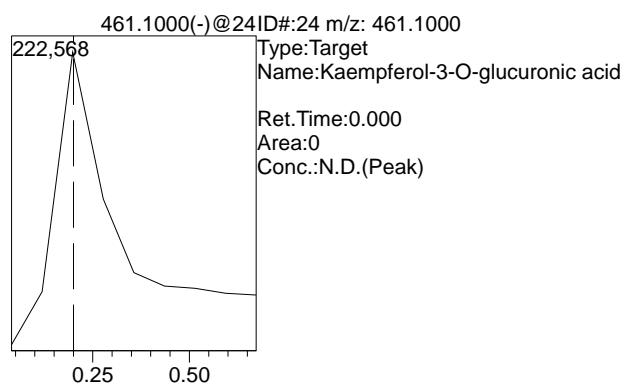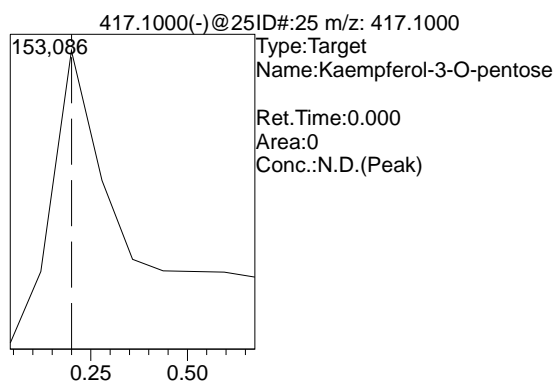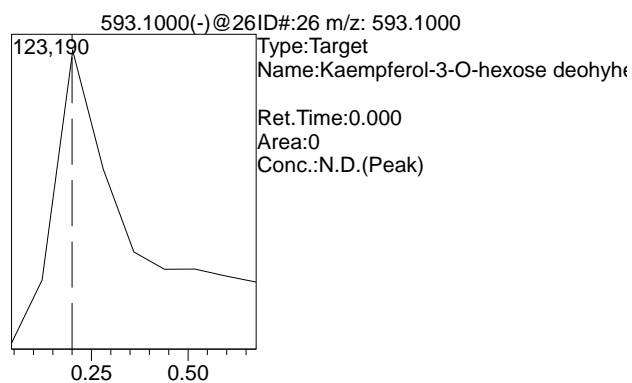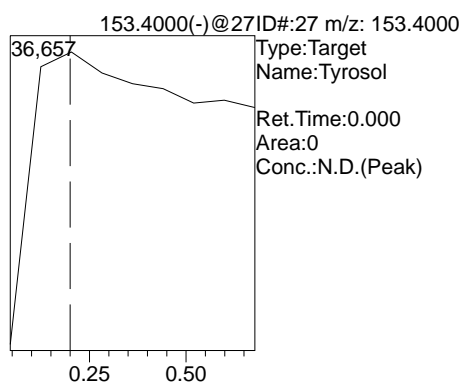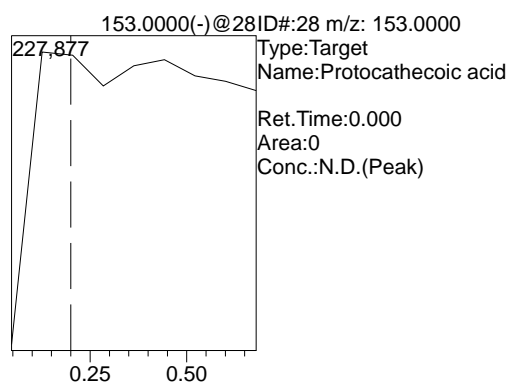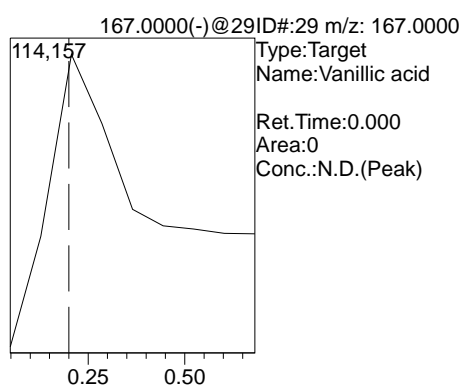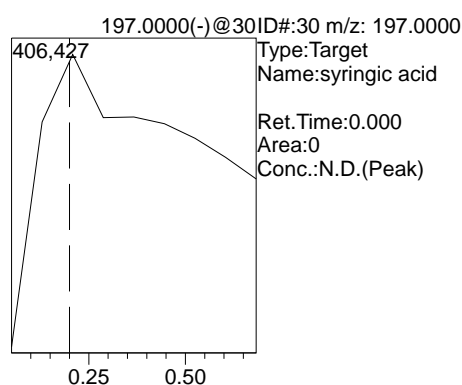

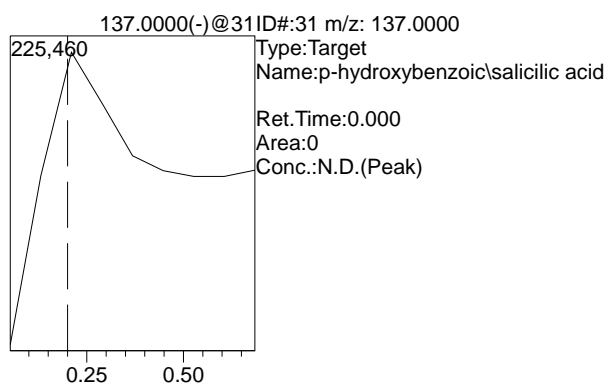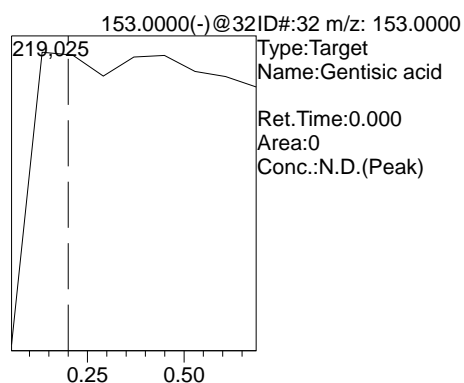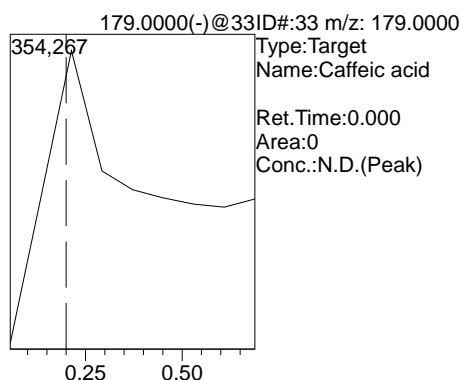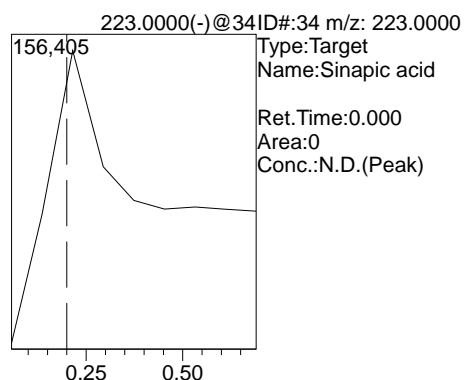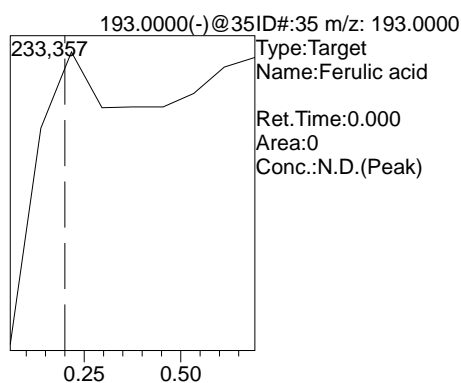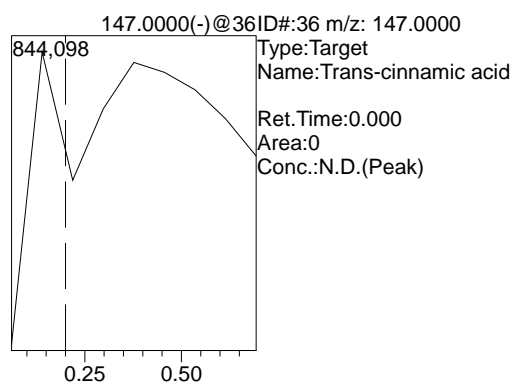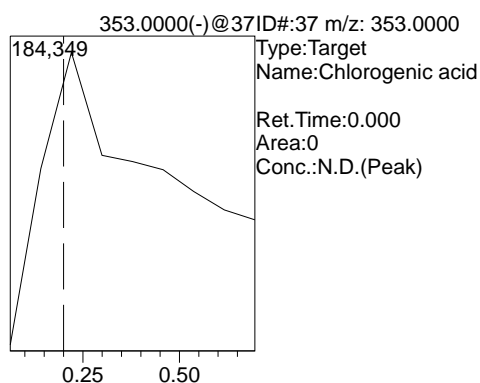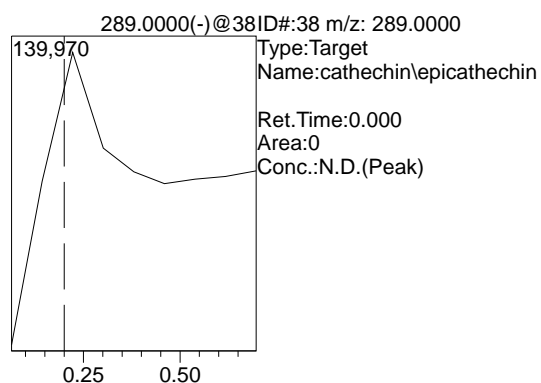

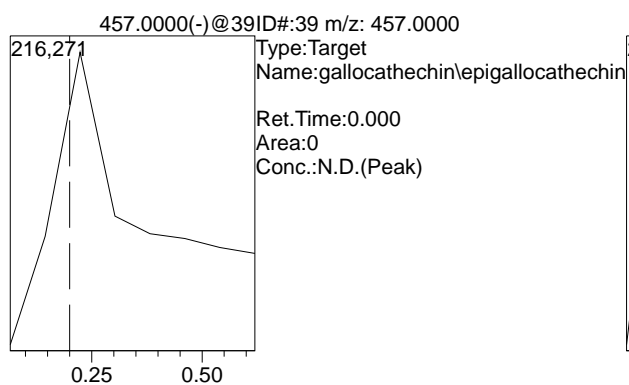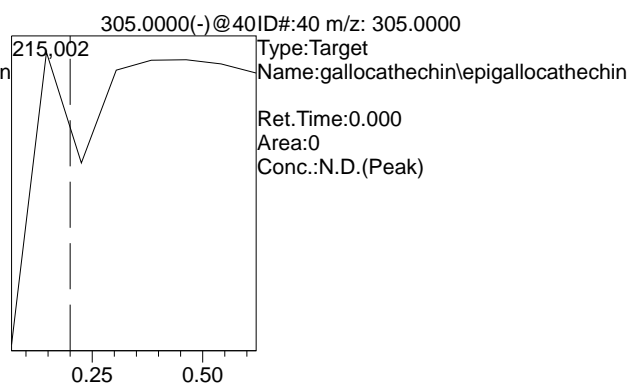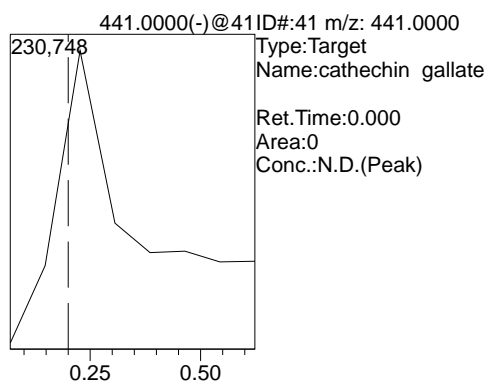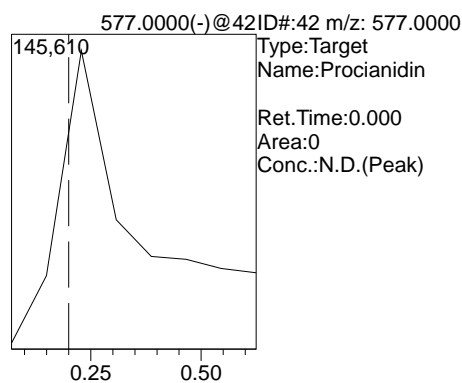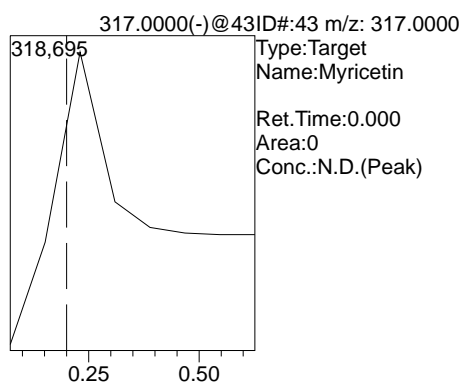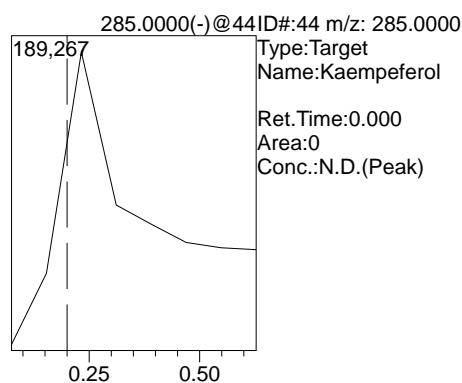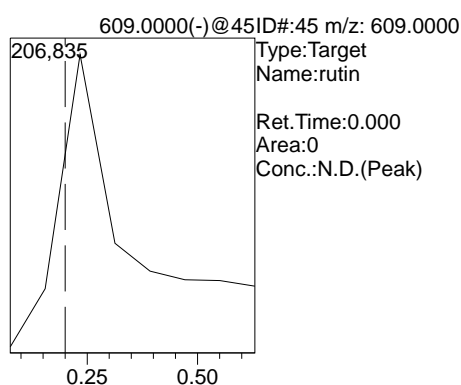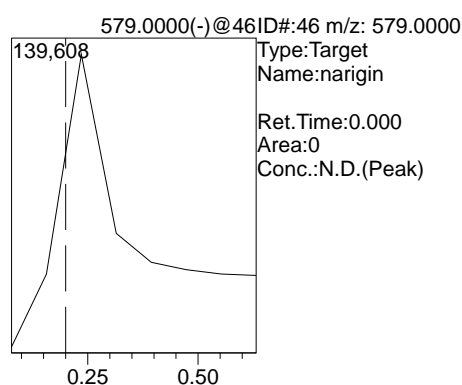

Supplement: s1 [file s1]
